# Supplementary material for: Solid-state synthesis of single-phase nickel monophosphosulfide for the oxygen evolution reaction
Source: Royal Society of Chemistry journal article supplement (doi:10.1039/d1dt02343h), 2021-01-01
Supplement: d1dt02343h1.pdf [file d1dt02343h1.pdf]

***Supporting Information:***

**Solid-state Synthesis of Single-phase Nickel Monophosphosulfide for Oxygen  
Evolution Reaction**

Miao Wang<sup>ab</sup>, Ali Saad<sup>ab</sup>, Xiaoguang Li<sup>a</sup>, Tao Peng<sup>ab</sup>, Qi-Tao Zhang<sup>c</sup>, Mohan Kumar<sup>ab</sup>, Wei Zhao<sup>a\*</sup>

<sup>a</sup> Institute for Advanced Study, Shenzhen University, Shenzhen 518060, China

<sup>b</sup> College of Physics and Optoelectronic Engineering, Shenzhen University, Shenzhen 518060, China

<sup>c</sup> International Collaborative Laboratory of 2D Materials for Optoelectronics Science and Technology of Ministry of Education, Institute of Microscale Optoelectronics, Shenzhen University, Shenzhen 518060, China

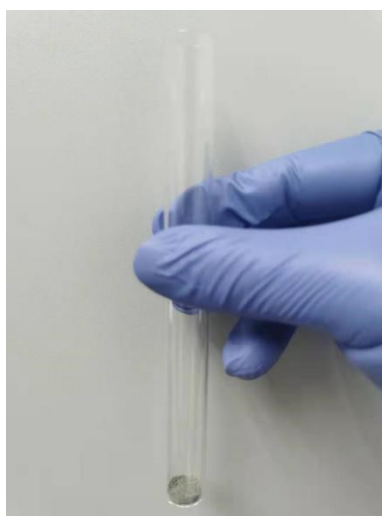

**Figure S1** Schematic of quartz ampoule with the well-mixed reactants inside.

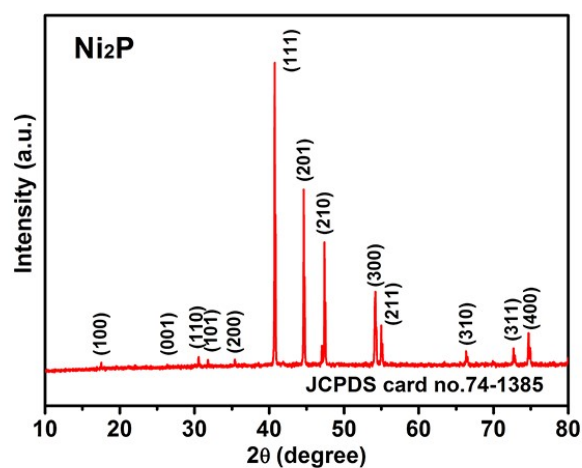

**Figure S2** Powder X-ray diffraction pattern of the Ni<sub>2</sub>P. The diffraction peaks can be indexed well by hexagonal Ni<sub>2</sub>P (JCPDS card no. 74-1385). No obvious impurity phase can be observed in the pattern.

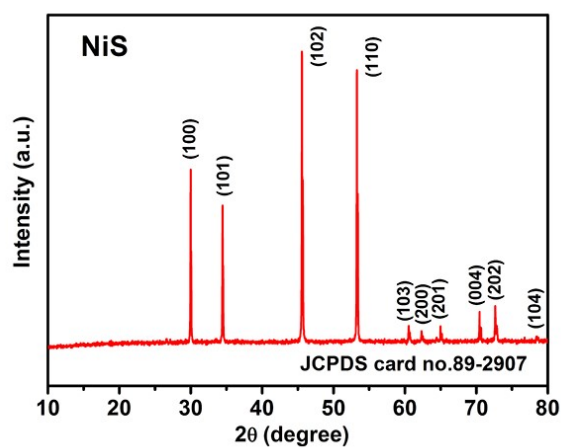

**Figure S3** Powder X-ray diffraction pattern of the NiS. The diffraction peaks can be indexed well by hexagonal NiS (JCPDS card no. 89-2907). No obvious impurity phase can be observed in the pattern.

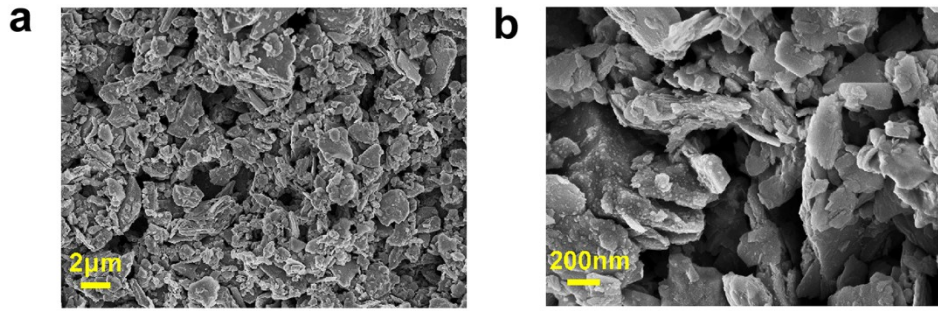

**Figure S4** (a) low-magnified, and (b) high-magnified SEM images of the as-synthesized NiPS sample. It is found that the NiPS sample shows an uneven plate-like morphology.

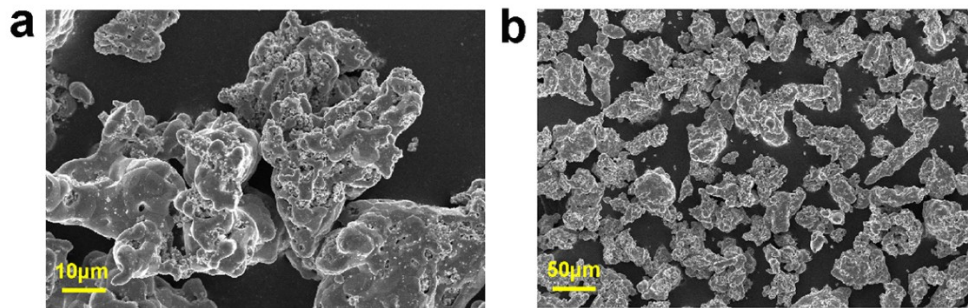

**Figure S5** (a) low-magnified, and (b) high-magnified SEM images of the as-synthesized Ni<sub>2</sub>P sample.

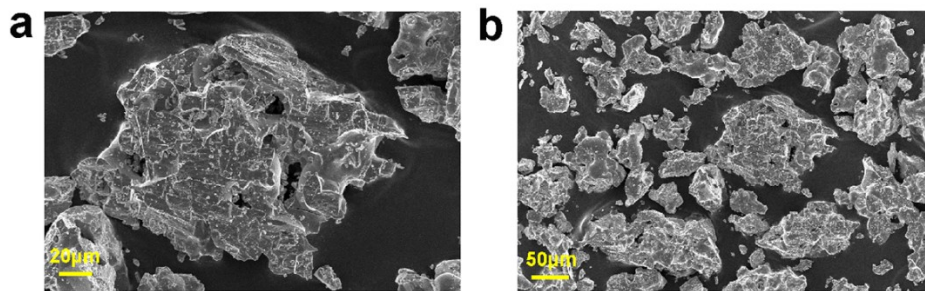

**Figure S6** (a) low-magnified, and (b) high-magnified SEM images of the as-synthesized NiS sample.

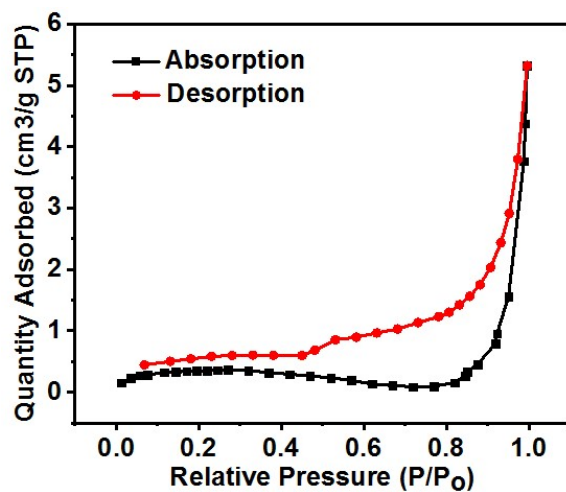

**Figure S7** Nitrogen adsorption-desorption isotherms for as-synthesized NiPS sample.

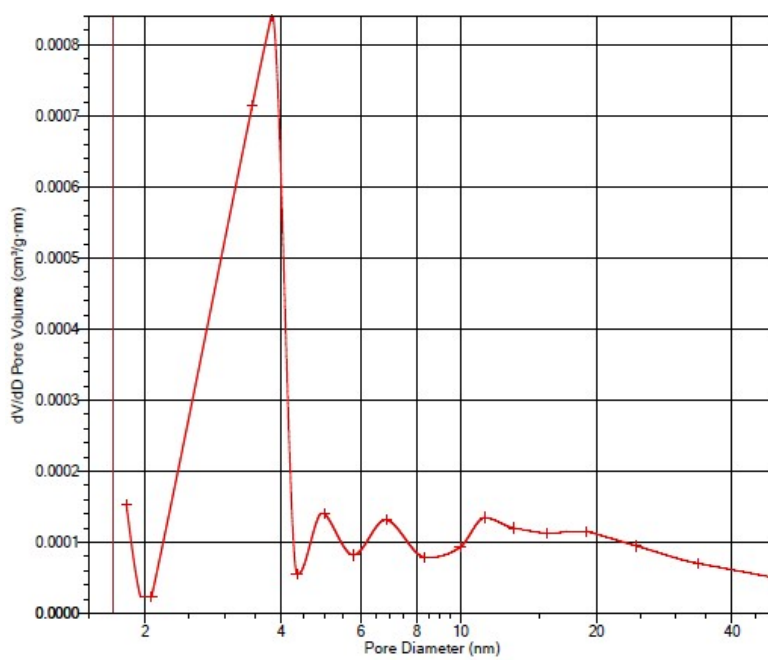

**Figure S8** Pore size distribution plot for as-synthesized NiPS sample.

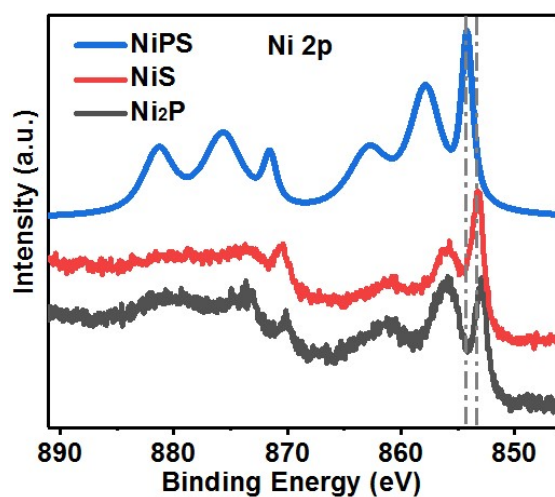

**Figure S9** X-Ray photoelectron spectral regions for Ni 2p levels of the as-synthesized NiPS, Ni<sub>2</sub>P and NiS samples.

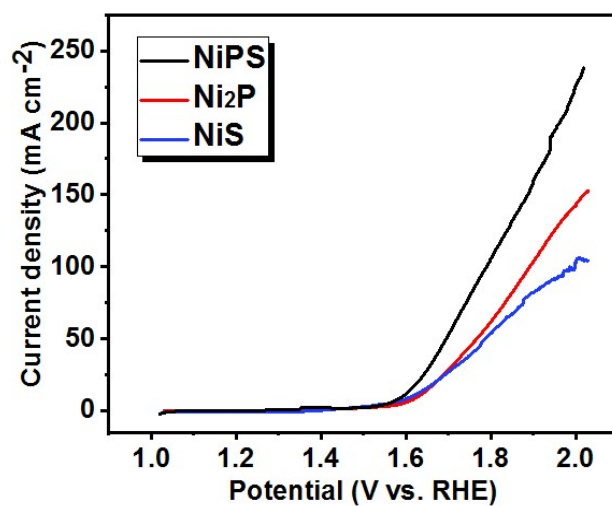

**Figure S10** LSV plots of the NiPS, Ni<sub>2</sub>P and NiS for OER in 1.0 M KOH solution.

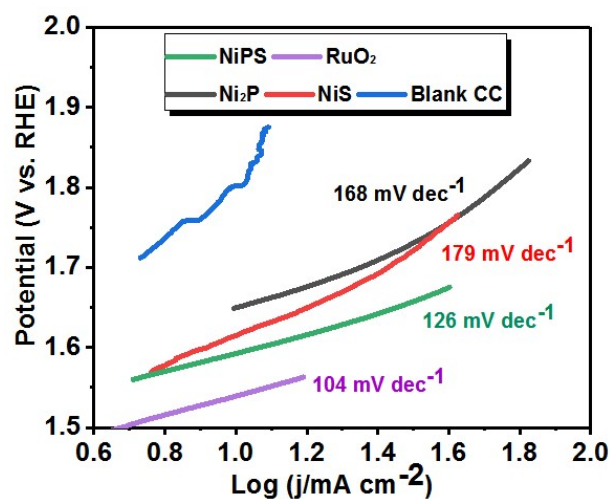

**Figure S11** Tafel plots of the NiPS, commercial RuO<sub>2</sub>, Ni<sub>2</sub>P, NiS and blank carbon cloth for OER in 1.0 M KOH solution.

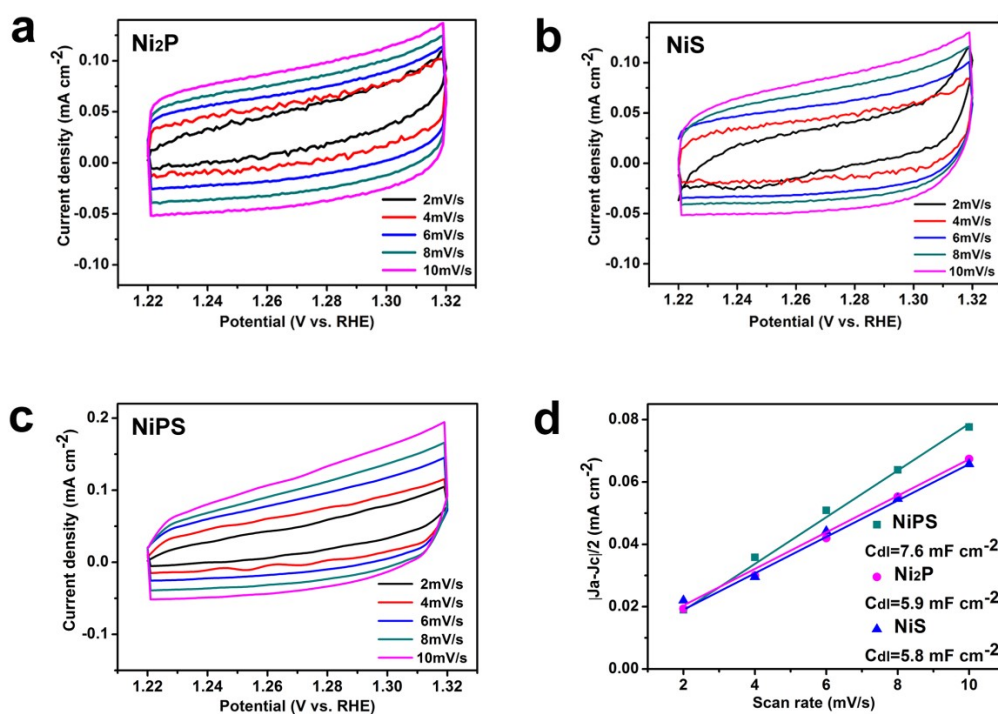

**Figure S12** (a-c) CV curves of Ni<sub>2</sub>P, NiS and NiPS at different scan rates. (d) The double-layer capacitances of NiPS, Ni<sub>2</sub>P and NiS.

The ECSA can be calculated from the  $C_{dl}$  according to the ratio:

$$ESCA = \frac{C_{dl}}{C_s}$$

Where  $C_s$  is the specific capacitance, chosen as  $C_s = 0.040 \text{ mF} \cdot \text{cm}^{-2}$  in 1 M KOH based on reported values.<sup>1-4</sup>

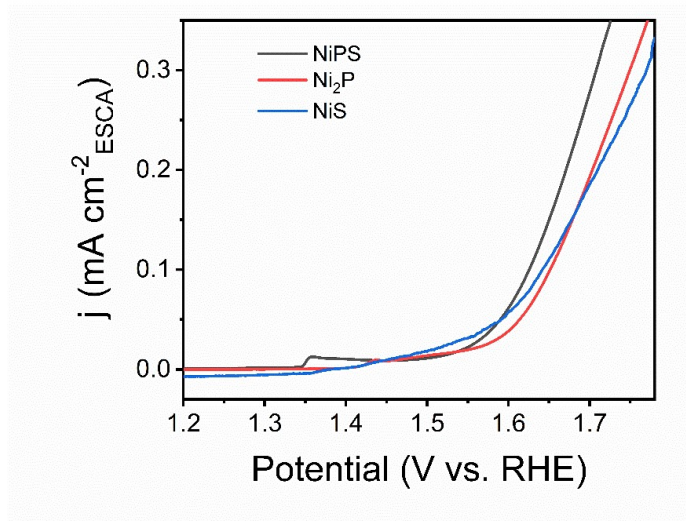

**Figure S13** The electrochemically active surface area (ECA) for linear-sweep voltammetry (LSV) for NiPS, Ni<sub>2</sub>P and NiS

**Table S1** Parametres ( $C_{dl}$ , ESCA and intrinsic activity) for each catalyst investigated in 1 M KOH.

| Catalyst                                                                      | NiPS   | Ni <sub>2</sub> P | NiS   |
|-------------------------------------------------------------------------------|--------|-------------------|-------|
| $C_{dl}$ (mF cm <sup>-2</sup> )                                               | 7.6    | 5.9               | 5.8   |
| ESCA (cm <sup>2</sup> )                                                       | 190    | 147.5             | 145   |
| Intrinsic catalyst activity<br>(mA cm <sup>-2</sup> ) $\eta = 430 \text{ mV}$ | 0.1074 | 0.082             | 0.065 |

#### References:

- Zhang, Y.; L, Gao.; Hensen, E.J.M.; Hofmann, J.P., Evaluating the Stability of Co<sub>2</sub>P Electrocatalysts in the Hydrogen Evolution Reaction for Both Acidic and Alkaline Electrolytes. *ACS Energy Lett.* **2018**, *3*, 1360–1365.
- Wang, H.; Zhang, X.; Xie, Y., Photocatalysis in two-dimensional black phosphorus: the roles of many-body effects. *ACS Nano* **2018**, *12*(10), pp.9648-9653.
- Liu, M.; Kong, L.J.; Wang, X.M.; He, J.; Bu, X.H., "Engineering bimetal synergistic electrocatalysts based on metal–organic frameworks for efficient oxygen evolution." *Small* **2019**, *15*, no. 45: 1903410.

4. Zeng, L.Y.; Sun, K.A.; Wang, X.B.; Liu, Y.Q.; Pan, Y.; Liu, Z.; Cao, D.W.; Song, Y.; Liu, S.H.; Liu, C.G., "Three-dimensional-networked  $\text{Ni}_2\text{P}/\text{Ni}_3\text{S}_2$  heteronanoflake arrays for highly enhanced electrochemical overall-water-splitting activity." *Nano Energy* **2018**, *51*, 26-36.

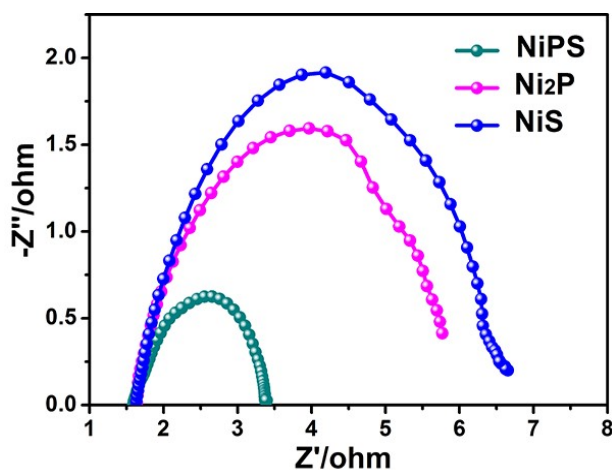

Figure S14 EIS curves of NiPS,  $\text{Ni}_2\text{P}$  and NiS.

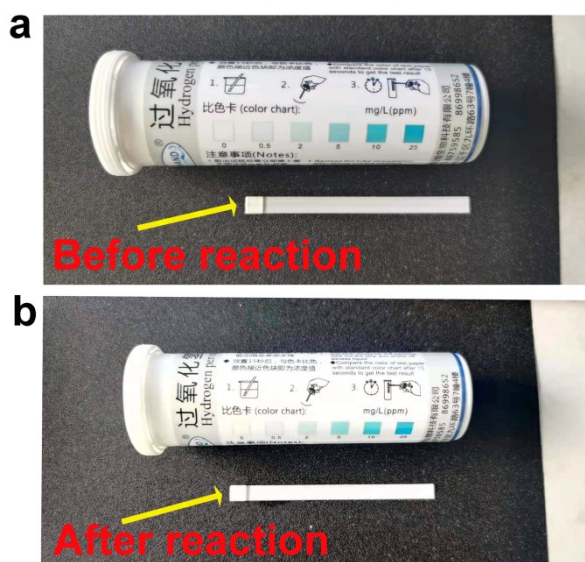

Figure S15 Results of hydrogen peroxide ( $\text{H}_2\text{O}_2$ ) rapid test card of the as-synthesized catalysts obtained in this work before and after OER.



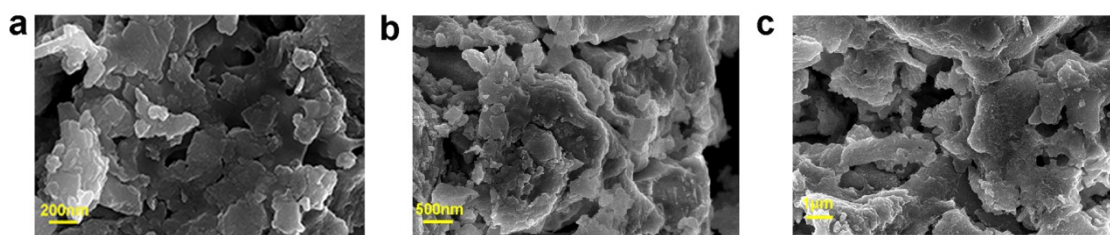

**Figure S16** (a-c) Low-magnified and high-magnified SEM images of the NiPS after OER.

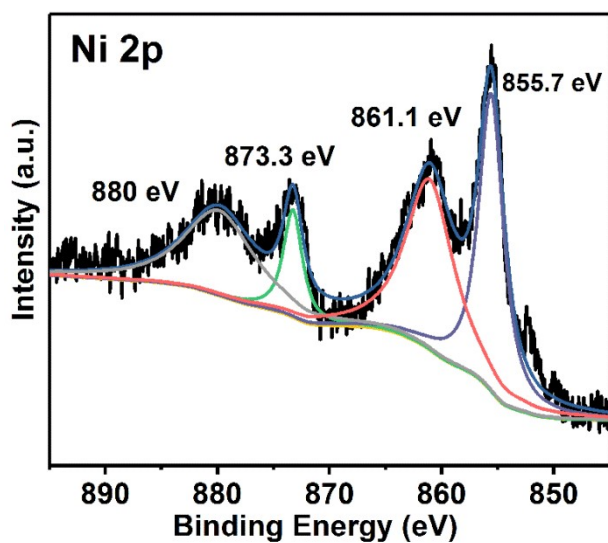

**Figure S17** XPS spectra of Ni 2p spectrum of the NiPS after OER, indicating the main formation of higher valence Ni-based intermediate.

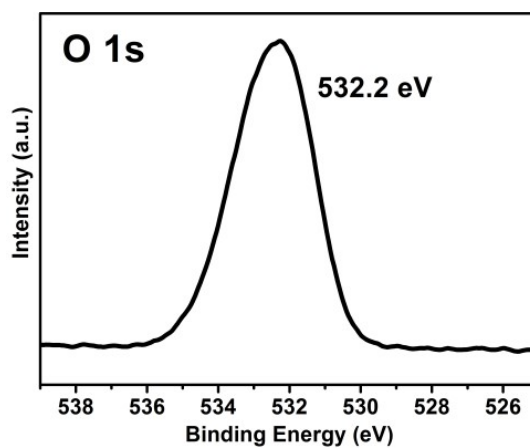

**Figure S18** XPS spectra of O 1s spectrum of the as-prepared NiPS sample.

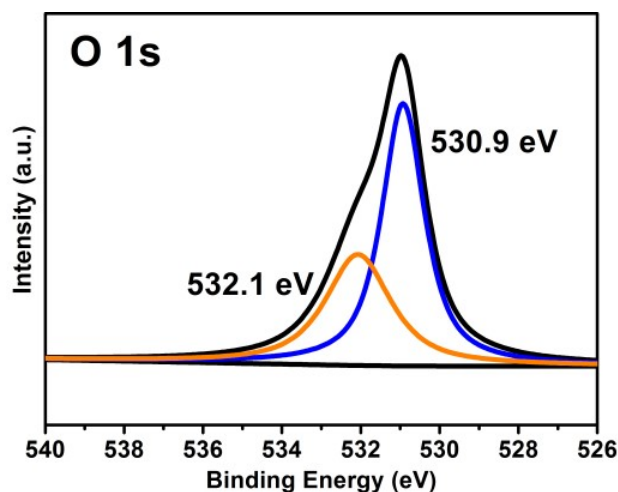

**Figure S19** XPS spectra of O 1s spectrum of the NiPS after OER. And the peak observed at  $\sim 530.9$  eV demonstrating the generation of hydroxyl-based functional groups during the OER process.

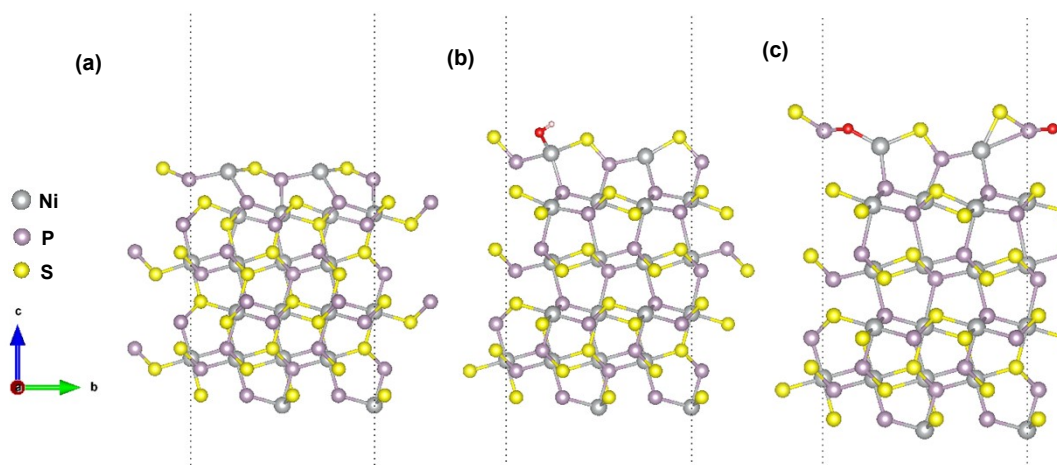

**Figure S20** The structures of vacant site, OH\* and O\* at the (200) surface of NiPS model.

The molecular orbital interaction between Ni and O was schematically drawn in **Figure S21**, from which we can see that the  $\pi$ -type interactions between Ni and O are strongly repulsive because interactions between  $\pi$ -type orbitals of Ni ( $d_{xz}$ ,  $d_{yz}$ ) and O ( $p_x$ ,  $p_y$ ) lead to formation of two occupied  $\pi$  bonding orbitals and another two occupied  $\pi^*$  anti-bonding orbitals which are energetically unfavorable due to two-center four-electrons interactions. In other words, Ni can't form double bond with O.

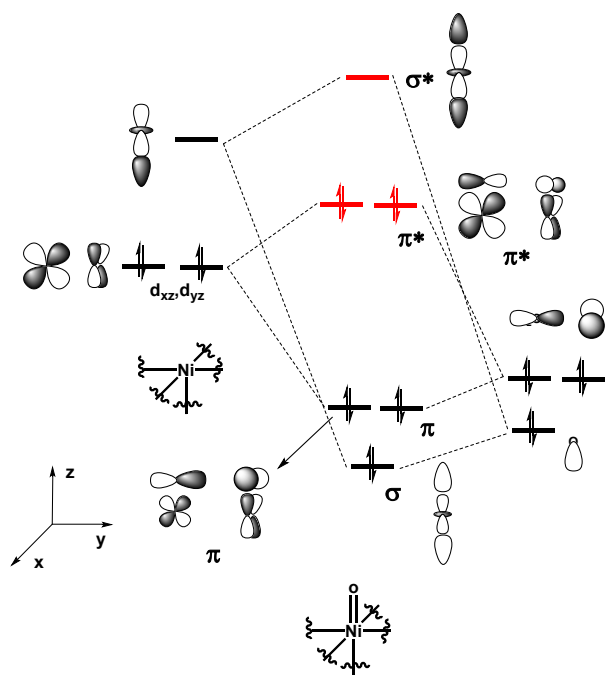

**Figure S21** Orbital interaction analysis of Ni-O bond in NiPS model.

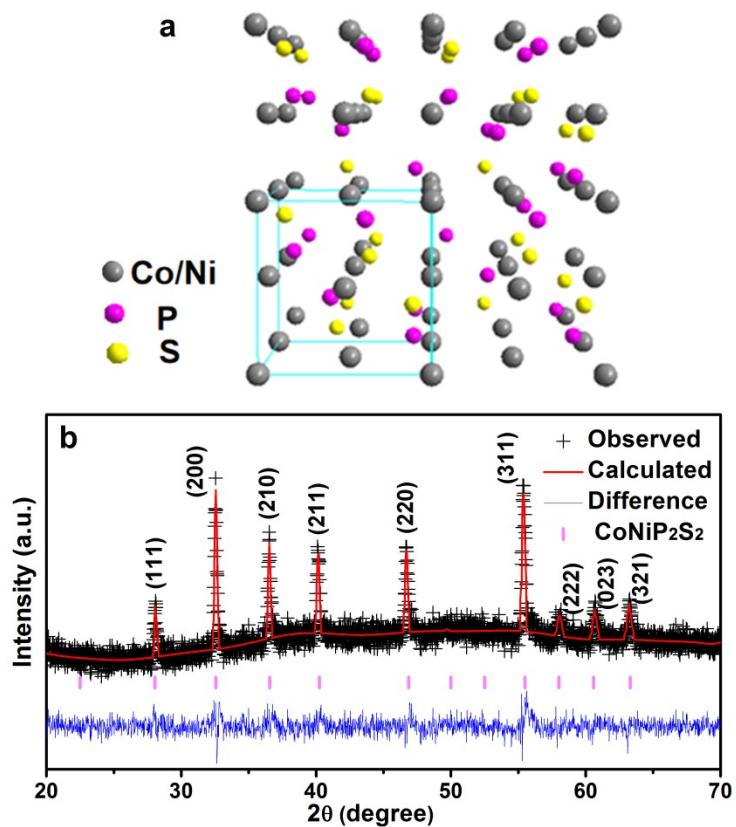

**Figure S22** (a) The schematic view of the crystal structure of the  $\text{CoNiP}_2\text{S}_2$ . (b) Measured (crosses) and calculated (red solid line) XRD patterns for  $\text{CoNiP}_2\text{S}_2$ . Bragg peak positions are indicated by short vertical bars.

The bottom of the figure shows the differences between measured and calculated intensities.

**Table S2** Crystallographic Parameters from the Powder XRD Refinement of CoNiP<sub>2</sub>S<sub>2</sub> sample at 300K.

| atom | site | x    | y    | z    | occup. | U <sub>iso</sub> (fixed) |
|------|------|------|------|------|--------|--------------------------|
| Co   | 4a   | 0    | 0    | 0    | 0.50   | e <sup>-5</sup>          |
| Ni   | 4a   | 0    | 0    | 0    | 0.50   | e <sup>-5</sup>          |
| P    | 4a   | 0.61 | 0.61 | 0.61 | 1.00   | 2×e <sup>-5</sup>        |
| S    | 4a   | 0.39 | 0.39 | 0.39 | 1.00   | 2×e <sup>-5</sup>        |

Space group: P2<sub>1</sub>3; a=b=c=5.5118Å, V=167.4481Å<sup>3</sup>, R<sub>wp</sub>=0.0441, R<sub>p</sub>=0.0343,  $\chi^2$ =1.277.

The morphology of the as-synthesized CoNiP<sub>2</sub>S<sub>2</sub> sample was observed using SEM, and **Figure S23(a,b)** display the representative SEM images with different magnification. It is found that the microstructure of the CoNiP<sub>2</sub>S<sub>2</sub> sample shows a lumpy aggregation without regular morphology. To further identify the microstructures of the CoNiP<sub>2</sub>S<sub>2</sub> sample, TEM images were also collected, as shown in **Figure S23(c,d)**. The elemental distribution of the as-synthesized CoNiP<sub>2</sub>S<sub>2</sub> was further investigated by scanning TEM-energy dispersive X-ray (STEM-EDX) and the results are shown in **Figure S23(e-i)**. These images show that Co, Ni, P and S elements are uniformly distributed in the CoNiP<sub>2</sub>S<sub>2</sub> sample.

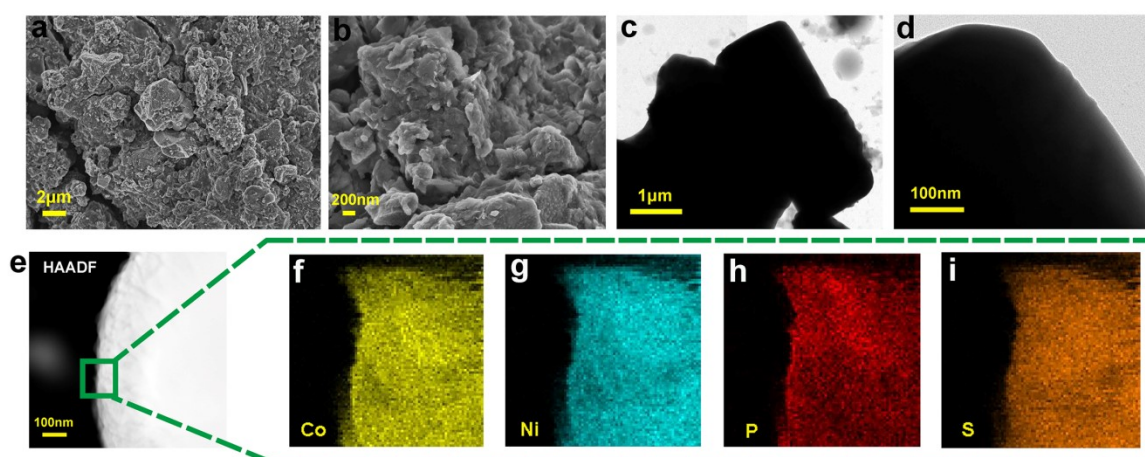

**Figure S23** (a) Low-magnified and (b) high-magnified SEM images of the CoNiP<sub>2</sub>S<sub>2</sub> sample with different magnification. (c) low-magnified and (d) high-magnified TEM images of the CoNiP<sub>2</sub>S<sub>2</sub> sample. (e-i) HAADF-STEM and corresponding EDX mapping images of the CoNiP<sub>2</sub>S<sub>2</sub> sample.

X-ray photoelectron spectroscopy (XPS) was also performed to further analyze the bonding characteristics as well as the composition of as-synthesized sample. As shown in **Figure S24a**, the Co 2p core level peaks can be divided into two satellite peaks and spin-orbit doublets. The peaks at around 778.7 eV and 793.7 eV are attributed to the  $2p_{3/2}$  and  $2p_{1/2}$  of  $\text{Co}^{3+}$ , respectively. The peaks situated at 781.2 eV and 782.7 eV can be ascribed to  $2p_{3/2}$  of  $\text{Co}^{2+}$ , and the peaks at 797.7 eV and 799.8 eV can be ascribed to  $2p_{1/2}$  of  $\text{Co}^{2+}$ , respectively, while the other two peaks at 786.6 eV and 803.9 eV are satellites.<sup>1-3</sup> **Figure S24b** indicates that the Ni 2p spectrum can be well-fitted with three spin-orbit doublets accompanied with two obvious shakeup satellites (862.8 eV and 881.1 eV), identified as Ni  $2p_{1/2}$  and Ni  $2p_{3/2}$  signals. Deconvolution of the Ni  $2p_{3/2}$  peak corresponds to three energy bands: 853.8 eV for  $\text{Ni}^{2+}$  and (856.8 eV and 858.7 eV) for  $\text{Ni}^{3+}$ , meanwhile the Ni  $2p_{1/2}$  peak exists in other three energy bands: 871 eV for  $\text{Ni}^{2+}$  and (874.4 eV and 876.6 eV) for  $\text{Ni}^{3+}$ .<sup>1,4,5</sup>

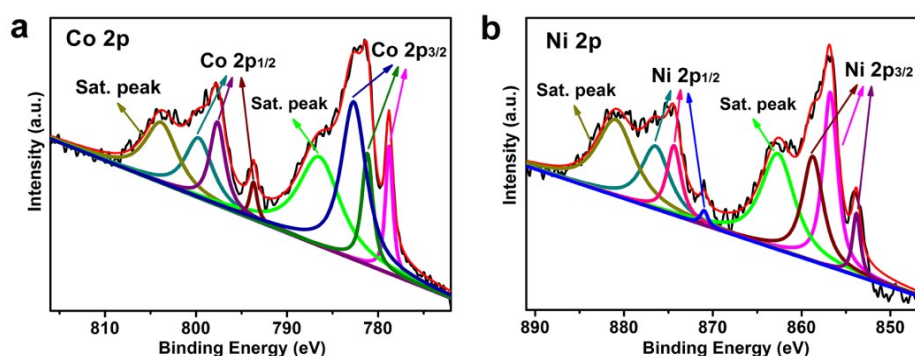

**Figure S24** X-Ray photoelectron spectral regions for (a) Co 2p and (b) Ni 2p levels of the as-synthesized  $\text{CoNiP}_2\text{S}_2$  sample.

The P 2p core level of XPS spectrum (**Figure S25**) has its spin-orbit doublet in the  $2p_{3/2}$  and  $2p_{1/2}$  peaks positioned at 129.4 eV and 130.1 eV.<sup>6</sup> In addition, **Figure S26** displays the S 2p spectrum, where S ( $2p_{3/2}$ ) and S ( $2p_{1/2}$ ) are located at 162.5 eV and 163.7 eV, respectively.<sup>7</sup>

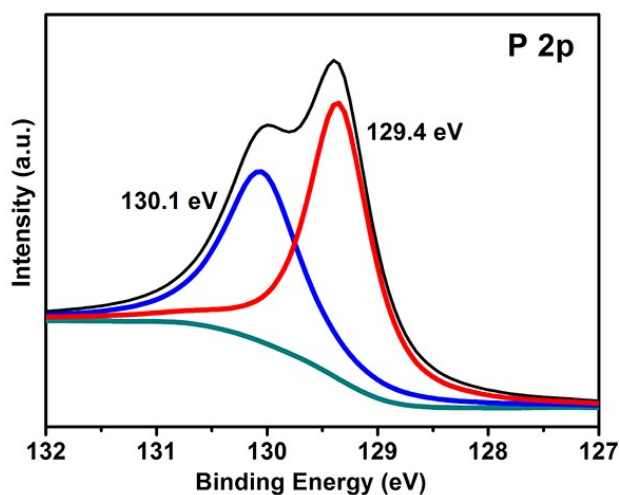

**Figure S25** X-Ray photoelectron spectral region for P 2p level of the CoNiP<sub>2</sub>S<sub>2</sub> sample.

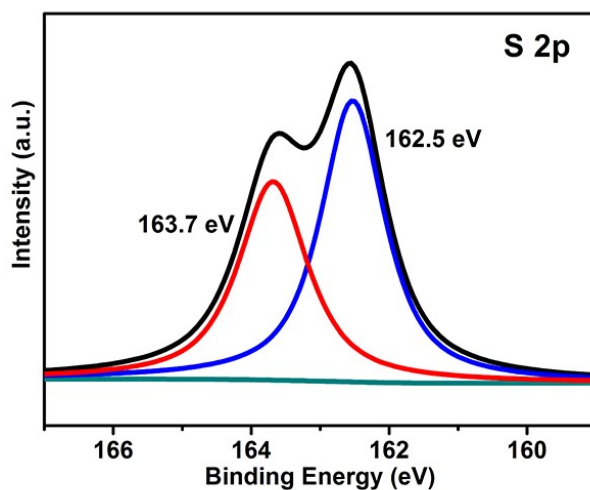

**Figure S26** X-Ray photoelectron spectral region for S 2p level of the CoNiP<sub>2</sub>S<sub>2</sub> sample.

#### References:

1. Zhao, M.; Zhu, L.; Fu, B.; Jiang, S.; Zhou, Y.; Song, Y., Sodium ion storage performance of NiCo<sub>2</sub>S<sub>4</sub> hexagonal nanosheets. *Acta Phys. -Chim. Sin.* **2019**, *35* (2), 193-199.
2. Pan, Y.; Sun, K.; Liu, S.; Cao, X.; Wu, K.; Cheong, W.-C.; Chen, Z.; Wang, Y.; Li, Y.; Liu, Y.; Wang, D.; Peng, Q.; Chen, C.; Li, Y., Core-shell ZIF-8@ZIF-67-Derived CoP nanoparticle-embedded N-doped carbon nanotube hollow polyhedron for efficient overall water splitting. *J. Am. Chem. Soc.* **2018**, *140* (7), 2610-2618.
3. Liu, P.; Lin, Y.; Li, J.; Wang, Z.; Nauman Ali, R.; Song, L.; Xiang, B.; Lu, Y., Engineering ternary pyrite-type CoPS nanosheets with an ultrathin porous structure for efficient electrocatalytic water splitting. *ChemElectroChem* **2019**, *6* (11), 2852-2859.

- Zhang, J.; Cui, R.; Li, X. a.; Liu, X.; Huang, W., A nanohybrid consisting of NiPS<sub>3</sub> nanoparticles coupled with defective graphene as a pH-universal electrocatalyst for efficient hydrogen evolution. *J. Mater. Chem. A* **2017**, 5 (45), 23536-23542.
- Li, X.; Xin, M.; Guo, S.; Cai, T.; Du, D.; Xing, W.; Zhao, L.; Guo, W.; Xue, Q.; Yan, Z., Insight of synergistic effect of different active metal ions in layered double hydroxides on their electrochemical behaviors. *Electrochim. Acta* **2017**, 253, 302-310.
- Peng, B.; Xu, Y.; Liu, K.; Wang, X.; Mulder, F. M., High-performance and low-cost sodium-ion anode based on a facile black phosphorus-carbon nanocomposite. *ChemElectroChem* **2017**, 4 (9), 2140-2144.
- Kim, Y.; Hwang, H.; Lawler, K.; Martin, S. W.; Cho, J., Electrochemical behavior of Ge and GeX<sub>2</sub> (X = O, S) glasses: Improved reversibility of the reaction of Li with Ge in a sulfide medium. *Electrochim. Acta* **2008**, 53 (15), 5058-5064.

The electrocatalytic performance of CoNiP<sub>2</sub>S<sub>2</sub> catalyst for OER was studied in alkaline medium (1.0 M KOH). The *iR*-corrected LSV curves of OER (**Figure S27a**) reveal that the CoNiP<sub>2</sub>S<sub>2</sub> only needs 376 mV overpotential to generate a current density of 20 mA cm<sup>-2</sup>. Based on the LSV curves, the Tafel plots are also built (**Figure S27b**). The CoNiP<sub>2</sub>S<sub>2</sub> catalyst shows a Tafel slope of 143 mV dec<sup>-1</sup>, implying a good reaction kinetics for the CoNiP<sub>2</sub>S<sub>2</sub> catalyst in an oxygen evolution process, although higher in comparison with that in the commercial RuO<sub>2</sub> (98 mV dec<sup>-1</sup>). Stability is another important characteristic for evaluation of catalyst performance. Hence, continuous CV measurements of CoNiP<sub>2</sub>S<sub>2</sub> were carried out for 5000 cycles in 1.0 M KOH solution at scan rate of 50 mV s<sup>-1</sup>. The polarization curves obtained before and after cycling (**Figure S27c**) revealed that no obvious activity degradation was observed. The charge transfer resistance (*R*<sub>ct</sub>) is related to the semicircle observed in the Nyquist curve, as shown in **Figure S27d**. It is found that the obviously smaller semicircle is obtained for CoNiP<sub>2</sub>S<sub>2</sub>, suggesting the smaller value of *R*<sub>ct</sub>, and thus the better OER kinetics among the tested catalysts.

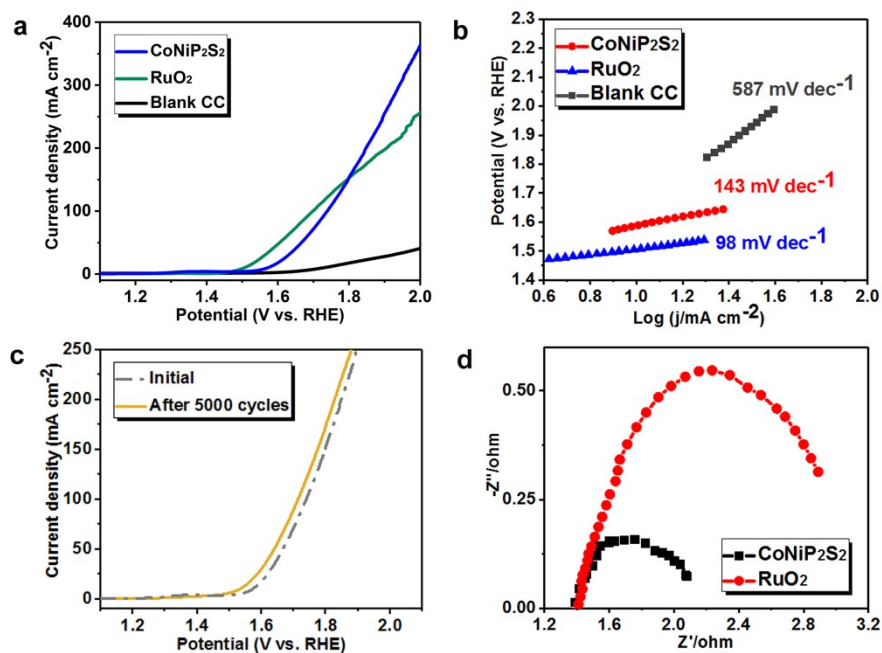

**Figure S27** (a) LSV curves of the CoNiP<sub>2</sub>S<sub>2</sub>, commercial RuO<sub>2</sub> and blank carbon cloth in 1.0 M KOH solution (scan rate 5 mV s<sup>-1</sup>) for the OER. (b) Tafel plots of the CoNiP<sub>2</sub>S<sub>2</sub>, commercial RuO<sub>2</sub>, and blank carbon cloth for OER in 1.0 M KOH solution. (c) Polarization curves of the CoNiP<sub>2</sub>S<sub>2</sub> before and after 5000 CV cycles. (d) Electrochemical impedance spectra (EIS) Nyquist plots of the CoNiP<sub>2</sub>S<sub>2</sub> and commercial RuO<sub>2</sub>.

**Figure S28** and **Figure S29** display the microstructural characterizations (SEM, TEM and EDX-mapping) of the  $\text{CoNiP}_2\text{S}_2$  catalyst after OER, showing a similar irregular morphology.

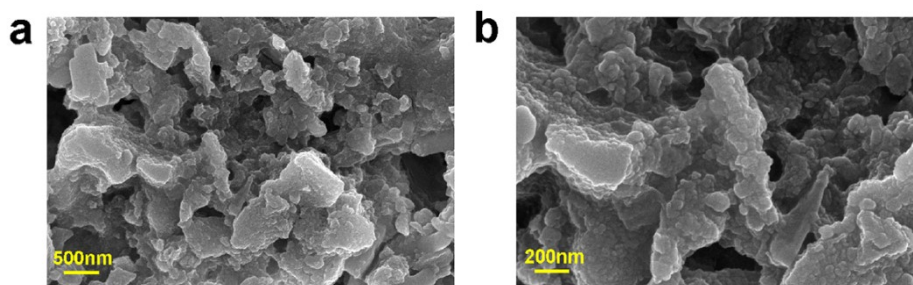

**Figure S28** (a-b) Low-magnified and high-magnified SEM images of the  $\text{CoNiP}_2\text{S}_2$  after OER.

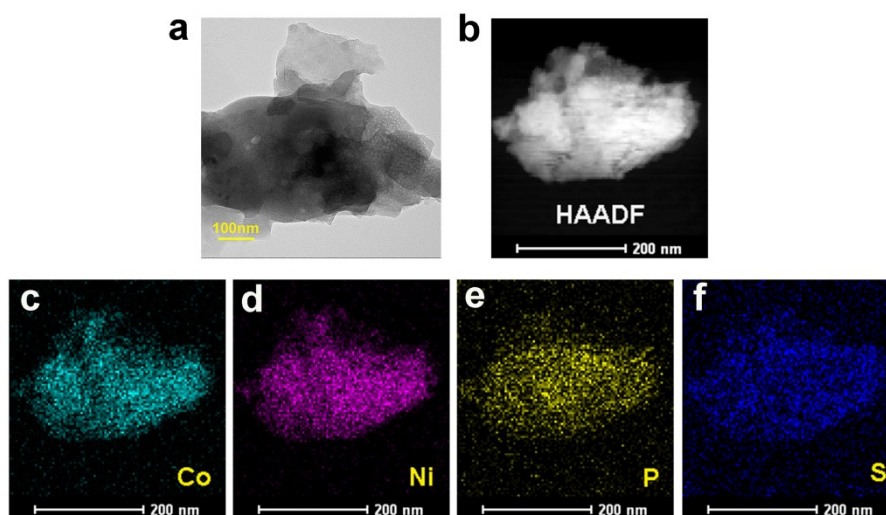

**Figure S29** (a) TEM image of the  $\text{CoNiP}_2\text{S}_2$  after OER. (b-f) HAADF-STEM and corresponding EDX-mapping images of the  $\text{CoNiP}_2\text{S}_2$  after OER.
